# Supplementary material
Source: ML conference proceedings conference paper supplement (https://openreview.net/forum?id=8X6cWIvY_2v)
Supplement: supplementary_material [file attachment]

# Bivariate Causal Discovery via Conditional Divergence

| Data set       | Baselines    |              |       |              | CDCI         |              |              |              |              |
|----------------|--------------|--------------|-------|--------------|--------------|--------------|--------------|--------------|--------------|
|                | ANM          | CDS          | IGCI  | RECI         | CCS          | CHD          | CKL          | CKM          | CTV          |
| Synthetic data |              |              |       |              |              |              |              |              |              |
| CE-Net         | 0.865        | <i>0.884</i> | 0.574 | 0.660        | <b>0.897</b> | <b>0.905</b> | <b>0.893</b> | <b>0.943</b> | <b>0.919</b> |
| CE-Multi       | 0.263        | 0.413        | 0.778 | <i>0.948</i> | <b>0.960</b> | <b>0.976</b> | <b>0.955</b> | 0.906        | <b>0.958</b> |
| CE-Gauss       | 0.884        | <i>0.905</i> | 0.160 | 0.710        | 0.905        | <b>0.914</b> | <b>0.910</b> | <b>0.916</b> | <b>0.918</b> |
| CE-Cha         | <i>0.705</i> | 0.695        | 0.556 | 0.590        | 0.693        | <b>0.720</b> | 0.698        | 0.697        | <b>0.722</b> |
| CE-All         | 0.653        | 0.713        | 0.512 | <i>0.742</i> | <b>0.866</b> | <b>0.884</b> | <b>0.867</b> | <b>0.865</b> | <b>0.881</b> |
| Real data      |              |              |       |              |              |              |              |              |              |
| D4-S1          | <i>0.604</i> | 0.582        | 0.380 | 0.550        | <b>0.646</b> | <b>0.651</b> | <b>0.635</b> | <b>0.632</b> | <b>0.646</b> |
| D4-S2A         | <i>0.616</i> | 0.580        | 0.447 | 0.592        | <b>0.649</b> | <b>0.630</b> | <b>0.652</b> | <b>0.667</b> | <b>0.673</b> |
| D4-S2B         | 0.521        | <i>0.529</i> | 0.450 | 0.491        | <b>0.594</b> | <b>0.600</b> | <b>0.602</b> | <b>0.614</b> | <b>0.609</b> |
| D4-S2C         | 0.556        | <i>0.564</i> | 0.441 | 0.521        | <b>0.565</b> | <b>0.565</b> | <b>0.573</b> | <b>0.584</b> | <b>0.590</b> |
| D4-All         | <i>0.561</i> | 0.556        | 0.445 | 0.532        | <b>0.602</b> | <b>0.599</b> | <b>0.608</b> | <b>0.620</b> | <b>0.622</b> |

Table 1: Causal Direction Prediction Performance on Synthetic and Real Datasets. The performance metric is AUC (higher is better). We compare five variants of our proposed **CDCI** (Conditional Divergence based Causal Inference) approach namely CCS, CHD, CKL, CKM, and CTV with four popular baselines: ANM (Mooij et al., 2016), CDS (Fonollosa, 2019), IGCI (Daniušis et al., 2010), and RECI (Blöbaum et al., 2019). *Italics*: best performance of baselines, **bold**: better than the best baseline, **red**: best performance among all.

## References

- Patrick Blöbaum, Dominik Janzing, Takashi Washio, Shohei Shimizu, and Bernhard Schölkopf. Analysis of cause-effect inference by comparing regression errors. *PeerJ Computer Science*, 5:e169, 2019.
- Povilas Daniušis, Dominik Janzing, Joris Mooij, Jakob Zscheischler, Bastian Steudel, Kun Zhang, and Bernhard Schölkopf. Inferring deterministic causal relations. In *Proceedings of the Conference on Uncertainty in Artificial Intelligence*, pages 143–150, 2010.
- José AR Fonollosa. Conditional distribution variability measures for causality detection. In *Cause Effect Pairs in Machine Learning*, pages 339–347. Springer, 2019.
- Joris M Mooij, Jonas Peters, Dominik Janzing, Jakob Zscheischler, and Bernhard

Schölkopf. Distinguishing cause from effect using observational data: Methods and benchmarks. *Journal of Machine Learning Research*, pages 1103–1204, 2016.
